# Supplementary material for: Land use and cover change in Japan and Tokyo’s appetite for meat
Source: Springer Nature journal article supplement (doi:10.1007/s11625-009-0085-1), 2009-09-29
Supplement: MOESM1 [file 11625_2009_85_MOESM1_ESM.doc]

**Tables**

Table 1: Fraction of the beef (in %) sold in Tokyo wholesale market by region of origin

|  | **1970** | **1975** | **1980** | **1985** | **1990** | **1995** | **2000** | **2005** |
| --- | --- | --- | --- | --- | --- | --- | --- | --- |
| **Hokkaido** | 7.4 | 7.4 | 1.1 | 0.8 | 1.0 | 3.0 | 3.8 | 9.4 |
| **Tohoku** | 33.7 | 36.3 | 34.8 | 32.2 | 30.7 | 31.6 | 30.8 | 31.3 |
| **Hokuriku** | 5.2 | 4.3 | 3.0 | 2.5 | 2.3 | 2.3 | 1.9 | 1.5 |
| **South Kanto** | 19.2 | 20.6 | 21.8 | 23.0 | 24.6 | 23.3 | 22.1 | 14.9 |
| **Higashiyama** | 1.9 | 1.7 | 2.8 | 1.5 | 2.9 | 2.7 | 2.0 | 1.4 |
| **Other Kanto** | 28.3 | 24.1 | 28.1 | 31.3 | 26.7 | 28.2 | 29.1 | 28.0 |
| **Tokai** | 2.0 | 4.2 | 7.0 | 6.3 | 4.2 | 3.3 | 4.0 | 4.4 |
| **Kinki** | 0.8 | 0.7 | 0.5 | 2.1 | 3.3 | 2.6 | 3.3 | 0.7 |
| **Chugoku** | 0.1 | 0.3 | 0.2 | 0.1 | 1.0 | 1.7 | 2.2 | 2.5 |
| **Shikoku** | 0.4 | 0.2 | 0.1 | 0.2 | 0.6 | 0.4 | 0.3 | 0.1 |
| **North Kyushu** | 0.3 | 0.2 | 0.6 | 0.1 | 0.7 | 0.5 | 0.4 | 2.2 |
| **South Kyushu** | 0.4 | 0.0 | 0.0 | 0.0 | 2.0 | 0.3 | 0.3 | 3.6 |
| **Okinawa** | 0.2 | 0.0 | 0.0 | 0.0 | 0.0 | 0.1 | 0.0 | 0.1 |

Table 2: Fraction (in %) of the of pork sold in Tokyo wholesale market by region of origin

|  | **1970** | **1975** | **1980** | **1985** | **1990** | **1995** | **2000** | **2005** |
| --- | --- | --- | --- | --- | --- | --- | --- | --- |
| **Hokkaido** | 1.0 | 1.0 | 0.4 | 0.0 | 0.0 | 0.0 | 0.0 | 0.0 |
| **Tohoku** | 19.9 | 19.9 | 19.9 | 26.2 | 32.2 | 27.5 | 17.8 | 22.1 |
| **Hokuriku** | 6.0 | 7.2 | 3.8 | 3.1 | 2.9 | 0.3 | 1.1 | 1.1 |
| **South Kanto** | 16.9 | 19.7 | 20.5 | 29.2 | 33.9 | 35.9 | 38.5 | 29.7 |
| **Higashiyama** | 6.7 | 3.7 | 3.0 | 1.8 | 1.6 | 1.2 | 0.4 | 0.5 |
| **Other Kanto** | 34.8 | 46.0 | 49.8 | 36.4 | 25.3 | 27.3 | 39.1 | 43.8 |
| **Tokai** | 2.0 | 1.8 | 0.4 | 1.9 | 1.2 | 1.7 | 1.0 | 0.5 |
| **Kinki** | 1.3 | 0.5 | 0.2 | 0.0 | 0.0 | 0.3 | 0.0 | 0.0 |
| **Chugoku** | 2.1 | 0.0 | 0.0 | 0.0 | 0.0 | 0.0 | 0.0 | 0.0 |
| **Shikoku** | 5.4 | 0.0 | 0.0 | 0.0 | 0.0 | 0.0 | 0.0 | 0.0 |
| **North Kyushu** | 1.6 | 0.0 | 0.0 | 0.0 | 0.0 | 0.4 | 0.0 | 0.0 |
| **South Kyushu** | 2.1 | 0.2 | 2.1 | 1.5 | 2.9 | 5.3 | 2.1 | 2.5 |
| **Okinawa** | 0.0 | 0.0 | 0.0 | 0.0 | 0.0 | 0.0 | 0.0 | 0.0 |

Table 3: Total direct area (in 1000 ha) required to raise domestic beef consumed in Tokyo.

|  | **1975** | **1980** | **1985** | **1990** | **1995** | **2000** | **2005** | **1975-2005 per cent Diff.** |
| --- | --- | --- | --- | --- | --- | --- | --- | --- |
| **Hokkaido** | 7.0 | 2.3 | 1.6 | 1.4 | 1.7 | 1.6 | 4.3 | -37.8 |
| **Tohoku** | 46.1 | 37.5 | 29.0 | 20.5 | 15.8 | 12.9 | 12.7 | -72.5 |
| **Hokuriku** | 1.2 | 0.8 | 0.4 | 0.3 | 0.2 | 0.1 | 0.1 | -89.2 |
| **Other Kanto** | 6.1 | 5.7 | 4.0 | 2.4 | 2.4 | 1.9 | 1.9 | -69.2 |
| **South Kanto** | 1.0 | 1.1 | 0.7 | 0.7 | 0.5 | 0.5 | 0.3 | -69.9 |
| **Higashiyama** | 0.6 | 0.7 | 0.3 | 0.3 | 0.2 | 0.1 | 0.1 | -83.4 |
| **Tokai** | 0.4 | 0.5 | 0.4 | 0.2 | 0.2 | 0.1 | 0.2 | -63.4 |
| **Kinki** | 0.3 | 0.2 | 0.3 | 0.3 | 0.2 | 0.2 | 0.1 | -75.9 |
| **Chugoku** | 3.3 | 1.9 | 1.2 | 0.7 | 0.5 | 0.3 | 0.4 | -88.9 |
| **Shikoku** | 0.3 | 0.2 | 0.2 | 0.1 | 0.0 | 0.0 | 0.0 | -91.8 |
| **North Kyushu** | 4.5 | 3.1 | 2.3 | 1.1 | 0.4 | 0.1 | 0.7 | -83.5 |
| **South Kyushu** | 28.2 | 6.5 | 5.1 | 3.0 | 0.9 | 0.2 | 1.9 | -93.2 |
| **Okinawa** | 1.2 | 1.6 | 0.8 | 0.4 | 0.2 | 0.0 | 0.7 | -41.6 |
| **Japan** | 100.2 | 62.0 | 46.1 | 31.2 | 23.3 | 18.2 | 23.4 | -76.6 |

Table 4: Total direct area (in 1000 ha) required to raise domestic pork consumed in Tokyo.

|  | **1975** | **1980** | **1985** | **1990** | **1995** | **2000** | **2005** | **1975-2005 per cent Diff.** |
| --- | --- | --- | --- | --- | --- | --- | --- | --- |
| **Hokkaido** | 0.5 | 1.5 | 1.1 | 0.6 | 0.3 | 0.2 | 0.2 | -65.0 |
| **Tohoku** | 5.5 | 3.7 | 3.7 | 1.5 | 0.5 | 0.3 | 0.2 | -97.0 |
| **Hokuriku** | 0.7 | 0.4 | 0.3 | 0.1 | 0.1 | 0.1 | 0.0 | -94.8 |
| **Other Kanto** | 3.9 | 2.4 | 1.5 | 0.6 | 0.3 | 0.3 | 0.2 | -94.8 |
| **South Kanto** | 1.8 | 1.1 | 0.9 | 0.4 | 0.2 | 0.2 | 0.1 | -93.8 |
| **Higashiyama** | 0.8 | 0.3 | 0.2 | 0.1 | 0.0 | 0.0 | 0.0 | -97.7 |
| **Tokai** | 1.3 | 0.4 | 0.3 | 0.2 | 0.1 | 0.1 | 0.1 | -95.0 |
| **Kinki** | 0.2 | 0.1 | 0.0 | 0.0 | 0.0 | 0.0 | 0.0 | -95.9 |
| **Chugoku** | 0.6 | 0.2 | 0.2 | 0.1 | 0.0 | 0.0 | 0.0 | -98.6 |
| **Shikoku** | 0.5 | 0.2 | 0.2 | 0.1 | 0.0 | 0.0 | 0.0 | -96.8 |
| **North Kyushu** | 1.5 | 0.7 | 0.6 | 0.2 | 0.1 | 0.1 | 0.1 | -94.7 |
| **South Kyushu** | 1.5 | 0.6 | 0.5 | 0.2 | 0.1 | 0.1 | 0.1 | -96.1 |
| **Okinawa** | 1.2 | 0.2 | 0.1 | 0.0 | 0.0 | 0.0 | 0.0 | -99.4 |
| **Japan** | 19.9 | 11.8 | 9.5 | 4.1 | 1.8 | 1.3 | 0.9 | -95.2 |

Table 5: Percentage of domestic farm land by region appropriated for raising beef consumed in Tokyo

|  | **1975** | **1980** | **1985** | **1990** | **1995** | **2000** | **2005** |
| --- | --- | --- | --- | --- | --- | --- | --- |
| **Hokkaido** | 7.8 | 2.9 | 2.1 | 1.5 | 1.6 | 1.7 | 4.7 |
| **Tohoku** | 24.5 | 22.1 | 17.4 | 14.7 | 14.3 | 15.7 | 19.0 |
| **Hokuriku** | 10.9 | 9.8 | 7.7 | 7.0 | 7.5 | 6.9 | 8.6 |
| **Other Kanto** | 17.4 | 20.1 | 17.6 | 14.3 | 17.4 | 17.6 | 19.9 |
| **South Kanto** | 21.9 | 28.3 | 25.5 | 29.6 | 29.2 | 33.4 | 27.0 |
| **Higashiyama** | 5.6 | 8.4 | 5.1 | 6.7 | 7.0 | 6.5 | 6.2 |
| **Tokai** | 4.3 | 6.4 | 5.8 | 3.7 | 3.4 | 3.8 | 6.0 |
| **Kinki** | 2.1 | 2.2 | 3.8 | 4.3 | 3.6 | 4.9 | 2.3 |
| **Chugoku** | 4.8 | 3.9 | 3.4 | 2.4 | 2.5 | 2.8 | 4.4 |
| **Shikoku** | 2.0 | 2.1 | 2.2 | 1.8 | 1.2 | 0.7 | 1.7 |
| **North Kyushu** | 4.8 | 4.2 | 3.5 | 2.1 | 1.1 | 0.3 | 3.1 |
| **South Kyushu** | 26.5 | 7.0 | 6.3 | 4.4 | 1.5 | 0.4 | 4.6 |
| **Okinawa** | 10.5 | 15.5 | 7.8 | 4.8 | 2.6 | 0.5 | 11.7 |
| **Japan** | 15.3 | 11.3 | 9.4 | 7.3 | 6.2 | 6.1 | 9.0 |

Table 6: Percentage of domestic farm land by region appropriated for raising pork consumed in Tokyo

|  | **1975** | **1980** | **1985** | **1990** | **1995** | **2000** | **2005** |
| --- | --- | --- | --- | --- | --- | --- | --- |
| **Hokkaido** | 2.6 | 7.7 | 6.5 | 5.3 | 4.8 | 6.1 | 7.3 |
| **Tohoku** | 17.0 | 10.7 | 10.2 | 8.3 | 6.6 | 6.1 | 6.6 |
| **Hokuriku** | 12.6 | 9.8 | 8.7 | 7.4 | 6.6 | 9.0 | 8.0 |
| **Other Kanto** | 17.0 | 13.0 | 9.9 | 8.6 | 9.2 | 11.8 | 13.5 |
| **South Kanto** | 14.8 | 11.2 | 12.7 | 13.0 | 12.8 | 15.4 | 14.5 |
| **Higashiyama** | 22.3 | 10.6 | 8.7 | 7.8 | 9.4 | 11.8 | 11.9 |
| **Tokai** | 18.8 | 8.3 | 8.6 | 8.1 | 8.7 | 11.4 | 13.8 |
| **Kinki** | 14.4 | 8.0 | 6.4 | 5.0 | 5.7 | 8.1 | 9.9 |
| **Chugoku** | 15.6 | 7.8 | 7.0 | 5.4 | 4.2 | 4.7 | 5.0 |
| **Shikoku** | 14.1 | 7.4 | 7.2 | 6.9 | 6.1 | 8.0 | 9.0 |
| **North Kyushu** | 14.6 | 7.5 | 7.7 | 6.9 | 6.9 | 9.3 | 11.4 |
| **South Kyushu** | 19.8 | 6.5 | 6.0 | 5.3 | 4.2 | 5.2 | 5.8 |
| **Okinawa** | 48.0 | 10.2 | 7.5 | 5.1 | 5.0 | 7.4 | 9.4 |
| **Japan** | 15.2 | 9.7 | 9.0 | 7.6 | 6.8 | 8.1 | 9.1 |

Table 7: Prices (in yen/Kg) for beef sold through Tokyo’s wholesale market.

|  | **1970** | **1975** | **1980** | **1985** | **1990** | **1995** | **2000** | **2005** |
| --- | --- | --- | --- | --- | --- | --- | --- | --- |
| **Hokkaido** | 439.9 | 948.1 | 1201.3 | 1361.0 | 1476.1 | 1354.4 | 1452.6 | 1337.3 |
| **Tohoku** | 669.7 | 1355.5 | 1738.4 | 1686.8 | 1844.2 | 1490.6 | 1544.9 | 1847.8 |
| **Hokuriku** | 721.5 | 1130.0 | 1586.3 | 1589.8 | 1651.5 | 1356.2 | 899.5 | 1639.1 |
| **Other Kanto** | 631.7 | 1256.2 | 1502.7 | 1558.1 | 1821.6 | 1405.8 | 1462.7 | 1720.8 |
| **South Kanto** | 533.2 | 1118.9 | 1223.3 | 1279.9 | 1315.7 | 1073.8 | 972.9 | 1252.3 |
| **Higashiyama** | 509.9 | 1315.8 | 1615.1 | 1717.5 | 2100.5 | 1369.9 | 1173.6 | 1519.6 |
| **Tokai** | 794.1 | 1345.4 | 1455.5 | 1668.9 | 1810.2 | 1496.8 | 1587.7 | 1655.6 |
| **Kinki** | 1118.9 | 1487.9 | 1899.4 | 1573.3 | 1293.3 | 1318.8 | 1336.9 | 1837.5 |
| **Chugoku** | 785.1 | 1248.7 | 1663.8 | 1803.4 | 1517.4 | 1586.3 | 1380.7 | 1902.0 |
| **Shikoku** | 970.4 | 1662.2 | 2028.6 | 2050.2 | 1875.4 | 2029.0 | 1833.6 | 1418.8 |
| **North Kyushu** | 668.1 | 1447.7 | 1565.8 | 1840.0 | 1766.7 | 1349.3 | 1955.4 | 1977.7 |
| **South Kyushu** | 681.8 | 1473.1 | 1833.6 | 1906.1 | 1752.8 | 1722.4 | 1838.1 | 1888.7 |
| **Okinawa** | 693.2 | - | - | 1456.9 | 1922.7 | 1245.0 | - | 1225.5 |
| **Japan** | **626.4** | **1254.7** | **1517.8** | **1513.2** | **1412.1** | **1323.7** | **1338.0** | **1632.3** |
| **Foreign**  **countries** | 450.4 | 1165.6 | 1328.7 | 1371.5 | 924.2 | 837.2 | 876.6 | 2162.1 |

Table 8: Prices (in yen/Kg) for pork sold through Tokyo’s wholesale market.

|  | **1970** | **1975** | **1980** | **1985** | **1990** | **1995** | **2000** | **2005** |
| --- | --- | --- | --- | --- | --- | --- | --- | --- |
| **Hokkaido** | 383.5 | 701.9 | 542.8 | 402.6 | - | - | - | - |
| **Tohoku** | 364.9 | 694.5 | 563.4 | 512.6 | 353.2 | 412.7 | 210.5 | 277.6 |
| **Hokuriku** | 354.1 | 798.7 | 589.2 | 724.9 | 401.0 | 306.1 | 370.0 | 517.6 |
| **Other Kanto** | 360.0 | 696.7 | 569.8 | 530.4 | 434.8 | 421.9 | 390.3 | 442.6 |
| **South Kanto** | 366.0 | 758.5 | 648.6 | 584.1 | 466.4 | 445.8 | 404.7 | 349.1 |
| **Higashiyama** | 377.2 | 694.7 | 525.2 | 503.7 | 377.6 | 364.4 | 333.7 | 316.0 |
| **Tokai** | 401.3 | 728.0 | 472.9 | 496.9 | 373.1 | 348.1 | 245.1 | 297.6 |
| **Kinki** | 378.8 | 747.8 | 570.8 | 848.4 | 433.6 | 1035.5 | - | - |
| **Chugoku** | 372.4 | - | - | - | - | - | - | 479.9 |
| **Shikoku** | 347.8 | 742.5 | - | - | - | 484.0 | - | - |
| **North Kyushu** | 376.5 | 768.6 | - | - | - | 558.9 | - | - |
| **South Kyushu** | 387.1 | 886.3 | 957.1 | 1033.6 | 545.3 | 565.7 | 405.0 | 374.1 |
| **Okinawa** | 511.0 | - | - | - | - | - | - | - |
| **Japan** | 372.4 | 709.3 | 588.8 | 554.4 | 453.2 | 438.1 | 415.7 | 448.7 |
| **Foreign countries** | 454.6 | 799.6 | 910.0 | - | - | 659.3 | 435.3 | 498.3 |
